# Supplementary material
Source: publisher figshare collection journal article supplement (https://acs.figshare.com/ndownloader/files/3621303)
Supplement: Supplementary file 1 [file 3621303]

## Supporting Information

### Light Absorption Properties and Radiative Effects of Primary Organic Aerosol Emissions

Zifeng Lu,<sup>\*,†</sup> David G. Streets,<sup>†</sup> Ekbordin Winijkul,<sup>†</sup> Fang Yan,<sup>†</sup> Yanju Chen,<sup>‡</sup> Tami C.  
Bond,<sup>‡</sup> Yan Feng,<sup>§</sup> Manvendra K. Dubey,<sup>||</sup> Shang Liu,<sup>||</sup> Joseph P. Pinto,<sup>⊥</sup> and Gregory R.  
Carmichael<sup>#</sup>

<sup>†</sup> Energy Systems Division, Argonne National Laboratory, Argonne, Illinois 60439, United States

<sup>‡</sup> Department of Civil and Environmental Engineering, University of Illinois at Urbana-Champaign, Urbana, Illinois 61801, United States

<sup>§</sup> Environmental Science Division, Argonne National Laboratory, Argonne, Illinois 60439, United States

<sup>||</sup> Earth and Environmental Sciences Division, Los Alamos National Laboratory, Los Alamos, New Mexico 87545, United States

<sup>⊥</sup> National Center for Environmental Assessment, U.S. EPA, Research Triangle Park, North Carolina 27709, United States

<sup>#</sup> Department of Chemical and Biochemical Engineering, The University of Iowa, Iowa City, Iowa 52242, United States

7 Pages, 1 Figure, 2 Tables

Submitted to *Environmental Science & Technology*

March 20, 2015

---

\* Corresponding Author: E-mail: [zlu@anl.gov](mailto:zlu@anl.gov); phone: (630) 252-9853; fax (630) 252-8007.

## **S1. $k_{\text{OA},550}$ and $w$ Corrections for Kirchstetter et al.'s Results**

### **Figures**

Figure S1. Estimated imaginary refractive index of OA ( $k_{\text{OA}}$ ) as a function of wavelength for the POA emitted from propane combustion. Subgraphs present the probability distributions of estimated  $k_{\text{OA}}$  at specified wavelengths. Blue, green, and red shades indicate the 68.27% confidence interval (corresponding to  $\pm 1\sigma$ ), the 95% confidence interval, and the outliers.

### **Tables**

Table S1. Global BC emissions in 2010 by sector and region ( $\text{Gg yr}^{-1}$ )

Table S2. Global OC emissions in 2010 by sector and region ( $\text{Gg yr}^{-1}$ )

## S1. $k_{\text{OA},550}$ and $w$ Corrections for Kirchstetter et al.'s Results

We made special corrections to widely-cited wavelength-dependent  $k_{\text{OA}}$  values of African savanna fire and firewood smoke given by Kirchstetter et al.,<sup>1</sup> although their estimates were prevalently used in climate models to evaluate the radiative impacts of light-absorbing organic aerosol (OA).<sup>2,3</sup> First, there were important caveats in determination of the magnitude of aerosol light absorption with the optical transmission method used by Kirchstetter et al.<sup>1</sup> Second, they calculated  $k_{\text{OA}}$  from mass absorption cross-sections (MAC) using Eq (2) of the main text which is an equation for organic liquid extracts of OA.<sup>4</sup> Since their OA MAC numbers were computed by measuring the changes in filter-based samples' attenuation before and after the acetone treatment, not by measuring the acetone extracts directly,  $k_{\text{OA}}$  values would be better not calculated from Eq (2) of the main text but from the Mie theory which is a function of the refractive index, density, and size distribution of the OA particles. Third, compared to the AERONET (Aerosol RObotic NETwork) retrieved data, aerosol absorption Ångström exponent (AAE) values have been reported to be significantly over-predicted over all world regions in model simulations using the  $k_{\text{OA}}$  datasets estimated by Kirchstetter et al.<sup>3</sup> For the reasons above, we made corrections to Kirchstetter et al.'s results. We accepted their estimations of OA MAC at different wavelengths, but used the Mie calculations to determine the corresponding  $k_{\text{OA}}$ . For a typical size distribution of African savanna fire with a count mean diameter (CMD) of 150 nm and geometric standard deviation (GSD) of 1.45,<sup>5</sup> assuming the density and the real refractive index of OA was  $1.2 \text{ g cm}^{-3}$  and 1.7,<sup>6-8</sup> respectively, we estimated the  $k_{\text{OA},550}$  and  $w$  were 0.022 and 3.3, respectively, both of which were lower than the original estimates.

## References

- (1) Kirchstetter, T. W.; Novakov, T.; Hobbs, P. V. Evidence that the spectral dependence of light absorption by aerosols is affected by organic carbon. *J. Geophys. Res.* **2004**, *109*, D21208, DOI: 10.1029/2004jd004999.
- (2) Feng, Y.; Ramanathan, V.; Kotamarthi, V. R. Brown carbon: A significant atmospheric absorber of solar radiation? *Atmos. Chem. Phys.* **2013**, *13*, 8607-8621.
- (3) Lin, G. X.; Penner, J. E.; Flanner, M. G.; Sillman, S.; Xu, L.; Zhou, C. Radiative forcing of organic aerosol in the atmosphere and on snow: Effects of soa and brown carbon. *J. Geophys. Res.* **2014**, *119*, 7453-7476.
- (4) Sun, H. L.; Biedermann, L.; Bond, T. C. Color of brown carbon: A model for ultraviolet and visible light absorption by organic carbon aerosol. *Geophys. Res. Lett.* **2007**, *34*, L17813, DOI: 10.1029/2007gl029797.
- (5) LeCanut, P.; Andreae, M. O.; Harris, G. W.; Wienhold, F. G.; Zenker, T. Airborne studies of emissions from savanna fires in southern africa .1. Aerosol emissions measured with a laser optical particle counter. *J. Geophys. Res.* **1996**, *101*, 23615-23630.
- (6) Dinar, E.; Riziq, A. A.; Spindler, C.; Erlick, C.; Kiss, G.; Rudich, Y. The complex refractive index of atmospheric and model humic-like substances (hulis) retrieved by a cavity ring down aerosol spectrometer (crd-as). *Faraday Discuss.* **2008**, *137*, 279-295.
- (7) Hoffer, A.; Gelencser, A.; Guyon, P.; Kiss, G.; Schmid, O.; Frank, G. P.; Artaxo, P.; Andreae, M. O. Optical properties of humic-like substances (hulis) in biomass-burning aerosols. *Atmos. Chem. Phys.* **2006**, *6*, 3563-3570.
- (8) Turpin, B. J.; Lim, H. J. Species contributions to pm<sub>2.5</sub> mass concentrations: Revisiting common assumptions for estimating organic mass. *Aerosol Sci. Tech.* **2001**, *35*, 602-610.

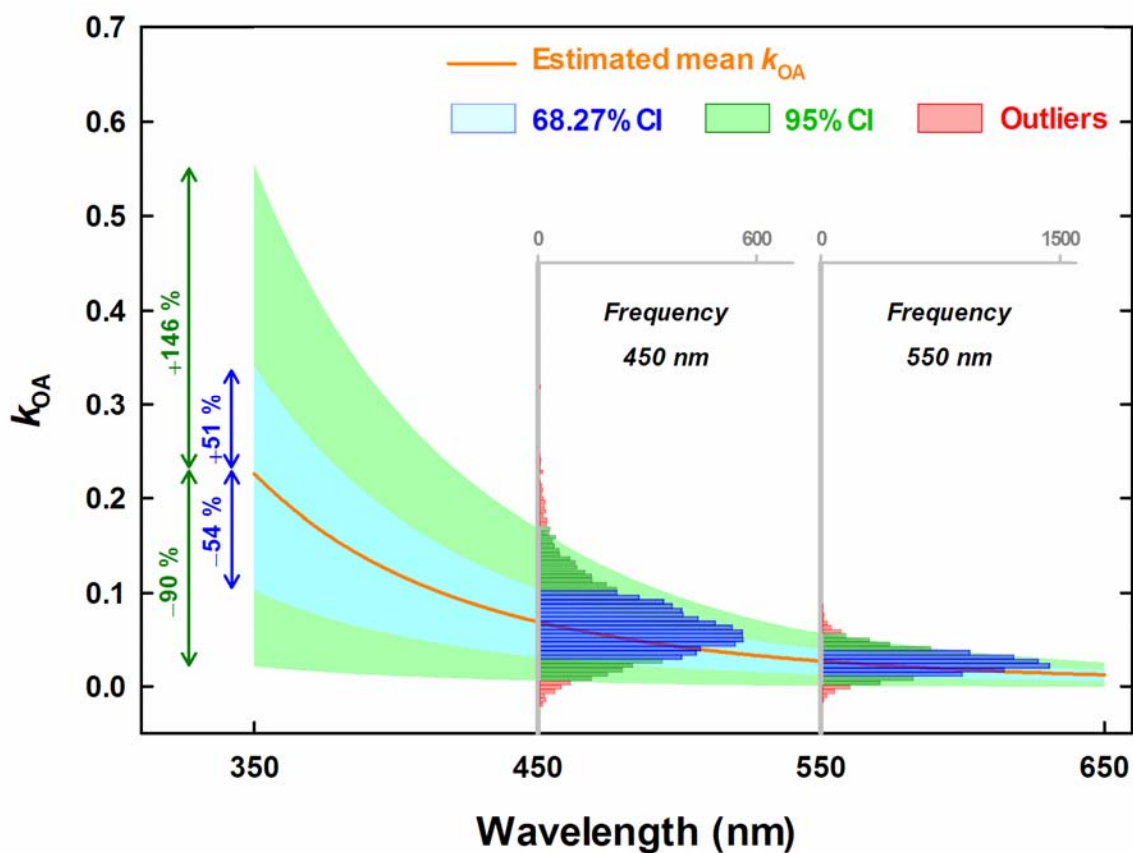

Figure S1. Estimated imaginary refractive index of OA ( $k_{\text{OA}}$ ) as a function of wavelength for the POA emitted from propane combustion. Subgraphs present the probability distributions of estimated  $k_{\text{OA}}$  at specified wavelengths. Blue, green, and red shades indicate the 68.27% confidence interval (corresponding to  $\pm 1\sigma$ ), the 95% confidence interval, and the outliers.

Table S1. Global BC emissions in 2010 by sector and region (Gg yr<sup>-1</sup>)

| Region          | Residential | Industry | Power | Transport | Open biomass burning | Total |
|-----------------|-------------|----------|-------|-----------|----------------------|-------|
| Canada          | 10          | 8        | 0     | 13        | 154                  | 186   |
| USA             | 53          | 53       | 2     | 98        | 151                  | 357   |
| Central America | 99          | 21       | 1     | 55        | 105                  | 282   |
| South America   | 93          | 133      | 1     | 156       | 1240                 | 1623  |
| Northern Africa | 25          | 22       | 0     | 78        | 18                   | 143   |
| Western Africa  | 357         | 28       | 0     | 16        | 1026                 | 1428  |
| Eastern Africa  | 180         | 8        | 0     | 14        | 352                  | 555   |
| Southern Africa | 136         | 20       | 2     | 31        | 1078                 | 1266  |
| OECD Europe     | 92          | 24       | 3     | 143       | 25                   | 287   |
| Eastern Europe  | 64          | 11       | 3     | 35        | 9                    | 122   |
| Former USSR     | 38          | 56       | 3     | 65        | 437                  | 599   |
| Middle East     | 33          | 54       | 4     | 144       | 49                   | 284   |
| South Asia      | 986         | 175      | 1     | 91        | 177                  | 1431  |
| East Asia       | 1095        | 364      | 20    | 230       | 191                  | 1899  |
| Southeast Asia  | 326         | 86       | 1     | 158       | 431                  | 1003  |
| Oceania         | 12          | 11       | 1     | 15        | 233                  | 271   |
| Japan           | 5           | 18       | 1     | 15        | 4                    | 43    |
| World           | 3604        | 1093     | 43    | 1358      | 5682                 | 11780 |

Table S2. Global OC emissions in 2010 by sector and region (Gg yr<sup>-1</sup>)

| Region          | Residential | Industry | Power | Transport | Open biomass burning | Total |
|-----------------|-------------|----------|-------|-----------|----------------------|-------|
| Canada          | 42          | 3        | 0     | 8         | 2210                 | 2264  |
| USA             | 203         | 20       | 5     | 77        | 1805                 | 2109  |
| Central America | 332         | 57       | 1     | 36        | 1083                 | 1508  |
| South America   | 341         | 595      | 1     | 68        | 9455                 | 10459 |
| Northern Africa | 28          | 49       | 0     | 82        | 144                  | 304   |
| Western Africa  | 1349        | 146      | 0     | 49        | 7536                 | 9080  |
| Eastern Africa  | 635         | 32       | 0     | 18        | 2480                 | 3165  |
| Southern Africa | 476         | 72       | 3     | 66        | 8377                 | 8993  |
| OECD Europe     | 245         | 14       | 6     | 122       | 236                  | 623   |
| Eastern Europe  | 242         | 17       | 7     | 13        | 56                   | 334   |
| Former USSR     | 113         | 113      | 4     | 56        | 4525                 | 4811  |
| Middle East     | 121         | 61       | 9     | 96        | 349                  | 636   |
| South Asia      | 3087        | 224      | 3     | 67        | 1424                 | 4805  |
| East Asia       | 2700        | 430      | 11    | 307       | 1463                 | 4910  |
| Southeast Asia  | 1210        | 200      | 2     | 152       | 4932                 | 6496  |
| Oceania         | 38          | 4        | 2     | 10        | 1726                 | 1780  |
| Japan           | 9           | 8        | 1     | 20        | 33                   | 70    |
| World           | 11169       | 2044     | 54    | 1246      | 47834                | 62347 |
